# Supplementary material
Source: PubMed Central journal article supplement (PMC7987787)
Supplement: NIHMS1666056-supplement-1.pdf [file NIHMS1666056-supplement-1.pdf]

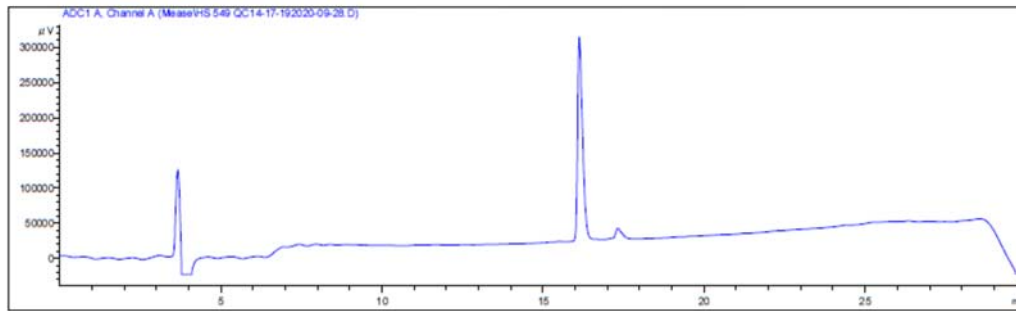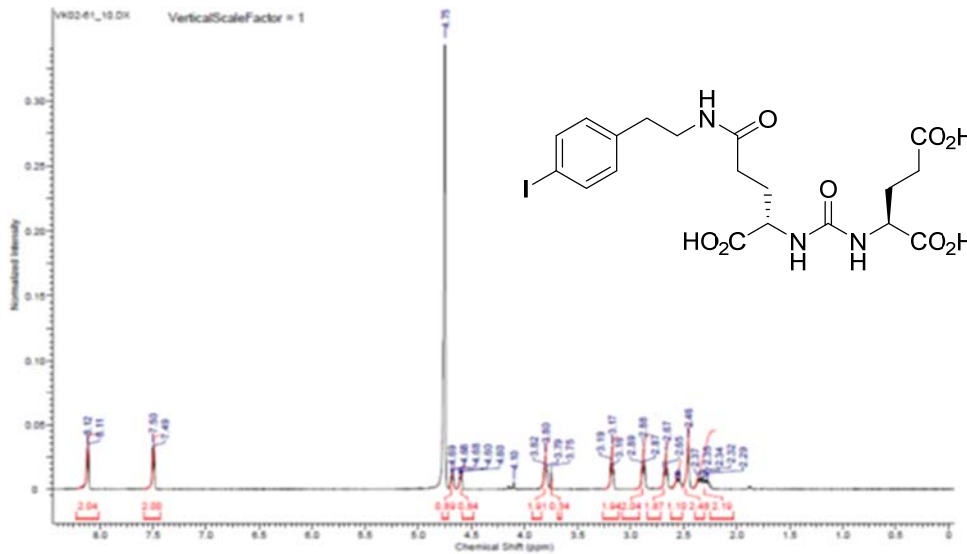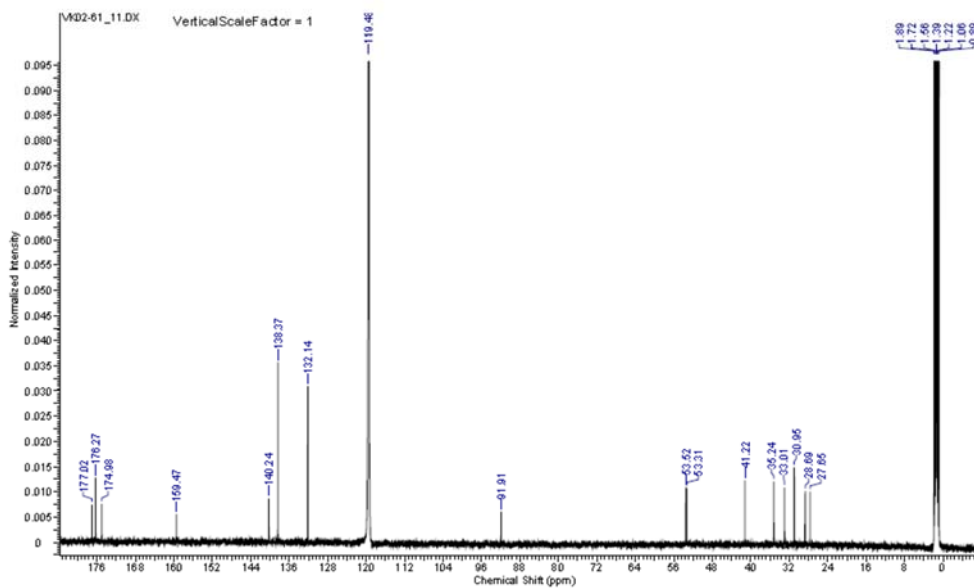

Figure S1. HS-549: **Top panel**) QC-HPLC: 250 X 4.6 mm Phenomenex 5  $\mu$  Luna C18 column, Mobile phase: A-0.1% TFA in water; B-0.1% TFA in acetonitrile. Gradient: 10% B for 0-2 min and 10% B to 70%B in 2-25 min (linear), flow rate 1mL/min. UV 220 nm. **Middle panel**)  $^1\text{H}$ -NMR spectrum (500 MHz,  $\text{CD}_3\text{CN}/\text{D}_2\text{O}$ ) and **Bottom panel**)  $^{13}\text{C}$ -NMR spectrum (125 MHz,  $\text{CD}_3\text{C N}/\text{D}_2\text{O}$ ).

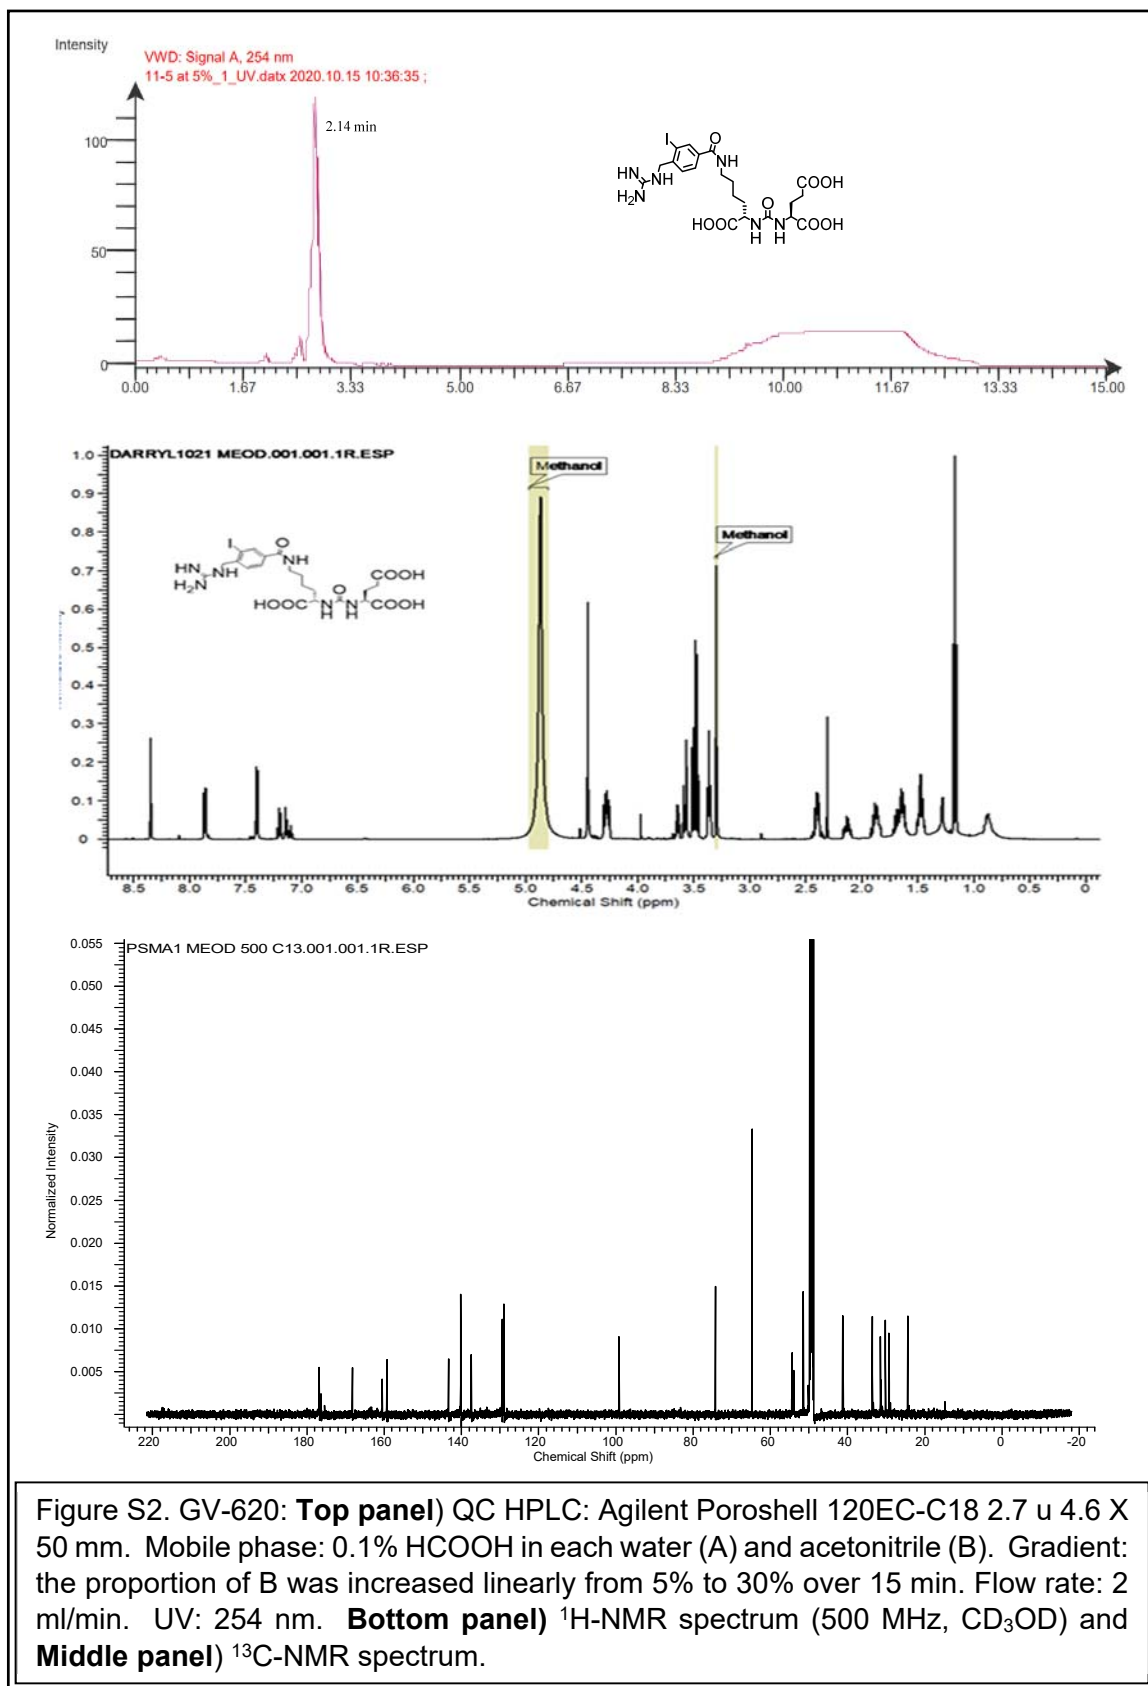

Figure S2. GV-620: **Top panel)** QC HPLC: Agilent Poroshell 120EC-C18 2.7 u 4.6 X 50 mm. Mobile phase: 0.1% HCOOH in each water (A) and acetonitrile (B). Gradient: the proportion of B was increased linearly from 5% to 30% over 15 min. Flow rate: 2 ml/min. UV: 254 nm. **Bottom panel)**  $^1\text{H-NMR}$  spectrum (500 MHz,  $\text{CD}_3\text{OD}$ ) and **Middle panel)**  $^{13}\text{C-NMR}$  spectrum.

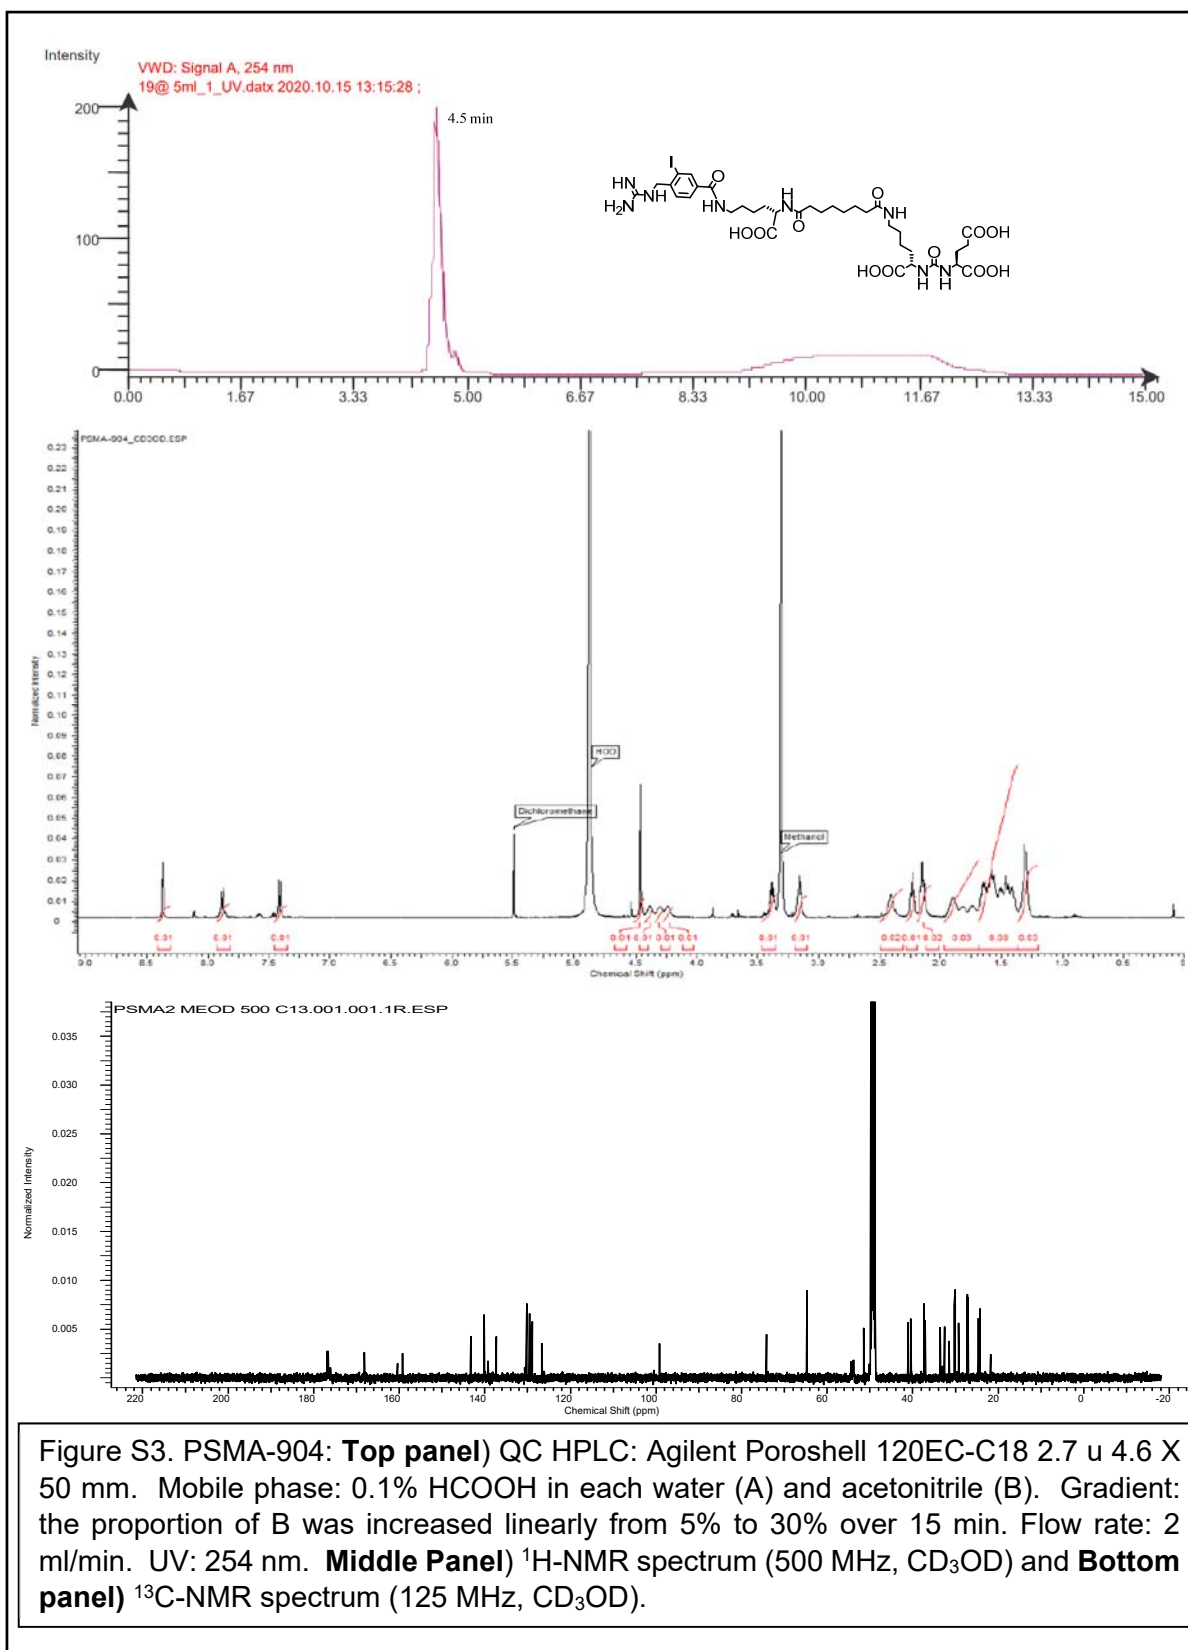

# HS-549

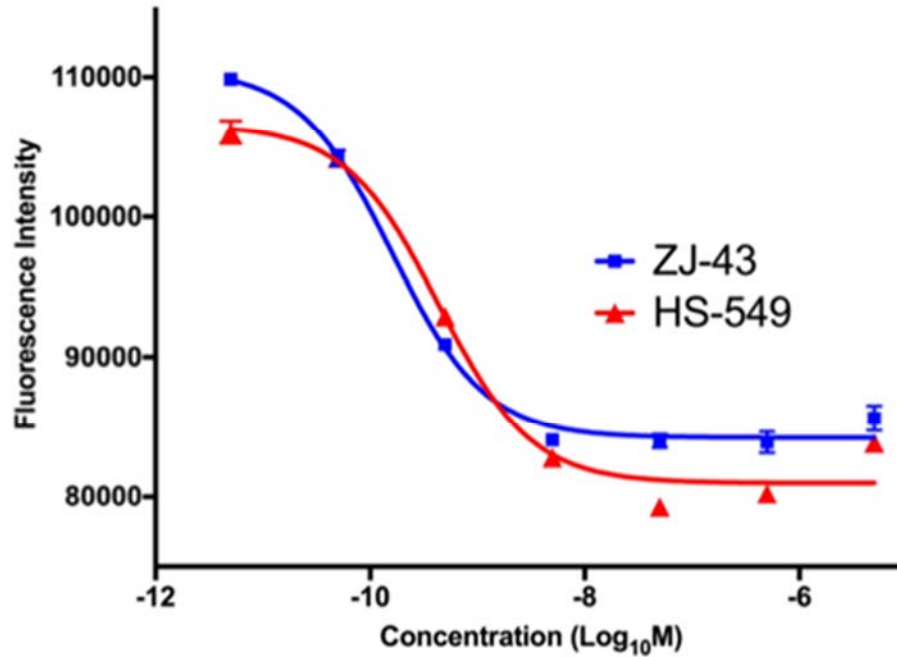

| Compound | $\text{IC}_{50}$ (nM) | $\text{IC}_{50}$ 95% Confidence Interval (nM) | $\text{K}_i$ (nM) | $\text{K}_i$ 95% Confidence Interval (nM) |
|----------|-----------------------|-----------------------------------------------|-------------------|-------------------------------------------|
| HS-549   | 0.43                  | 0.31 – 0.60                                   | 0.09              | 0.06 – 0.12                               |
| ZJ-43    | 0.16                  | 0.12 – 0.21                                   | 0.03              | 0.02 – 0.04                               |

Figure S4. Amplex assay data for HS-549.

# GV-620

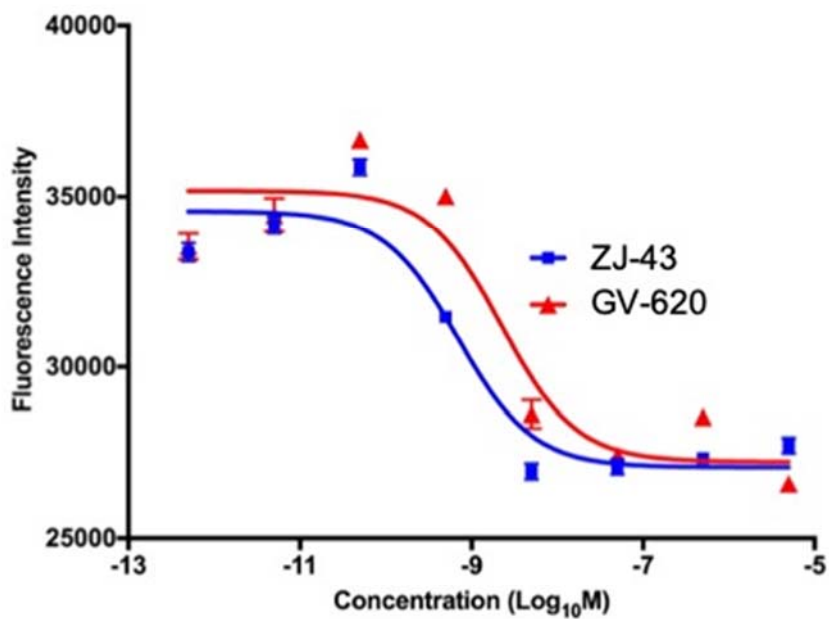

| Compound | $\text{IC}_{50}$ (nM) | $\text{IC}_{50}$ 95% Confidence Interval (nM) | $\text{K}_i$ (nM) | $\text{K}_i$ 95% Confidence Interval (nM) |
|----------|-----------------------|-----------------------------------------------|-------------------|-------------------------------------------|
| GV-620   | 2.24                  | 0.89 – 5.64                                   | 0.45              | 0.18 – 1.13                               |
| ZJ-43    | 0.70                  | 0.34 – 1.43                                   | 0.14              | 0.07 – 0.29                               |

Figure S5. Amplex assay data for GV-620.

# GV-904

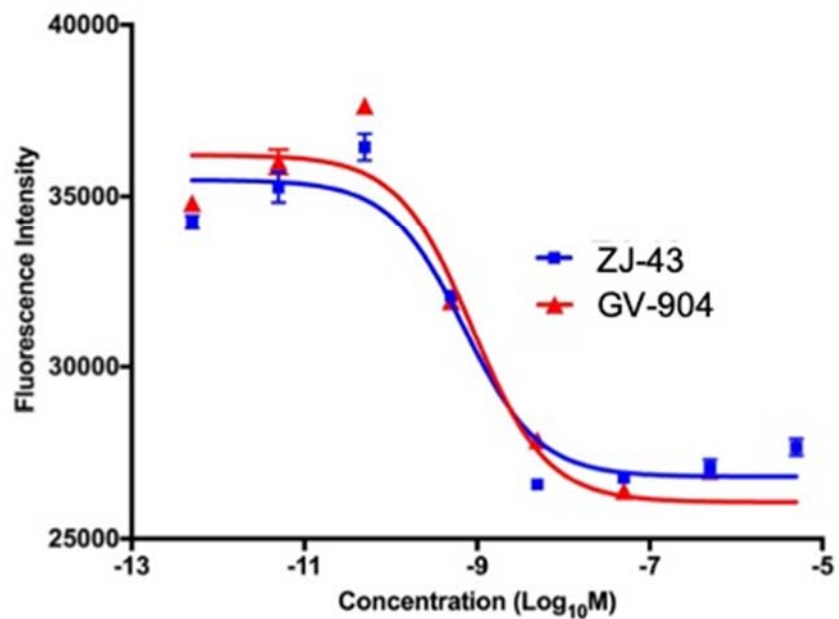

| Compound | $\text{IC}_{50}$ (nM) | $\text{IC}_{50}$ 95% Confidence Interval (nM) | $\text{K}_i$ (nM) | $\text{K}_i$ 95% Confidence Interval (nM) |
|----------|-----------------------|-----------------------------------------------|-------------------|-------------------------------------------|
| GV-904   | 0.88                  | 0.47 – 1.63                                   | 0.18              | 0.09 – 0.32                               |
| ZJ-43    | 0.70                  | 0.37 – 1.32                                   | 0.14              | 0.07 – 0.26                               |

Figure S6. Amplex assay data for GV-904.

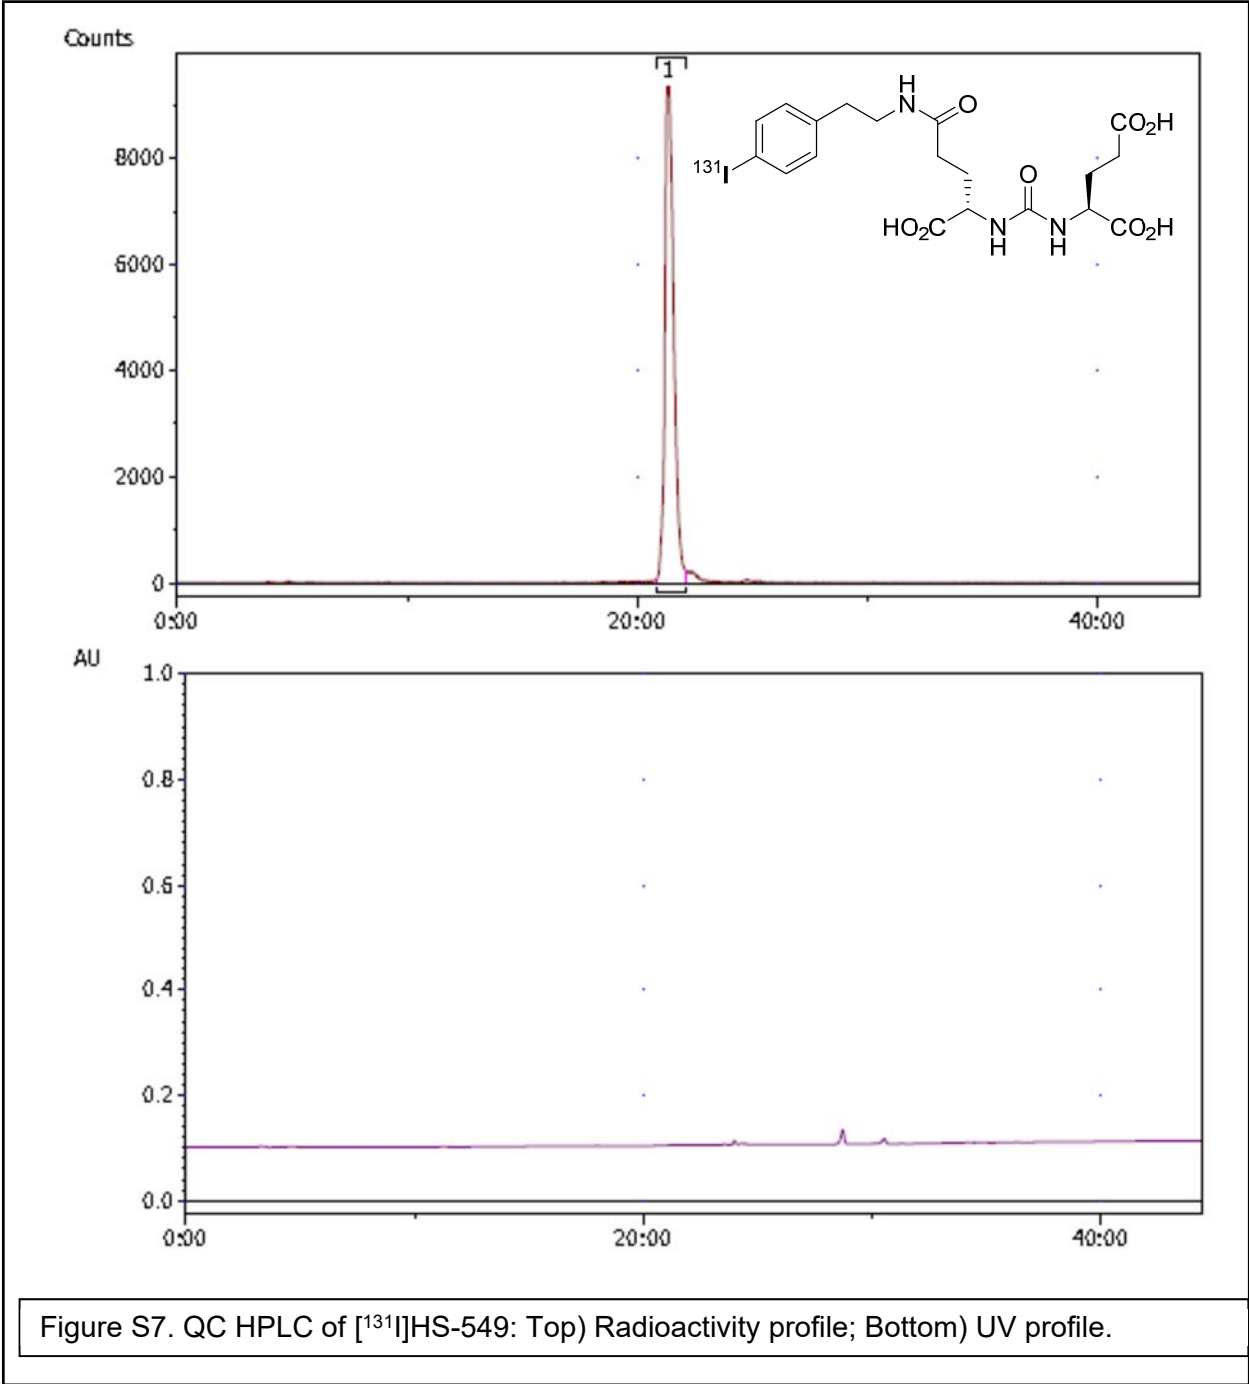

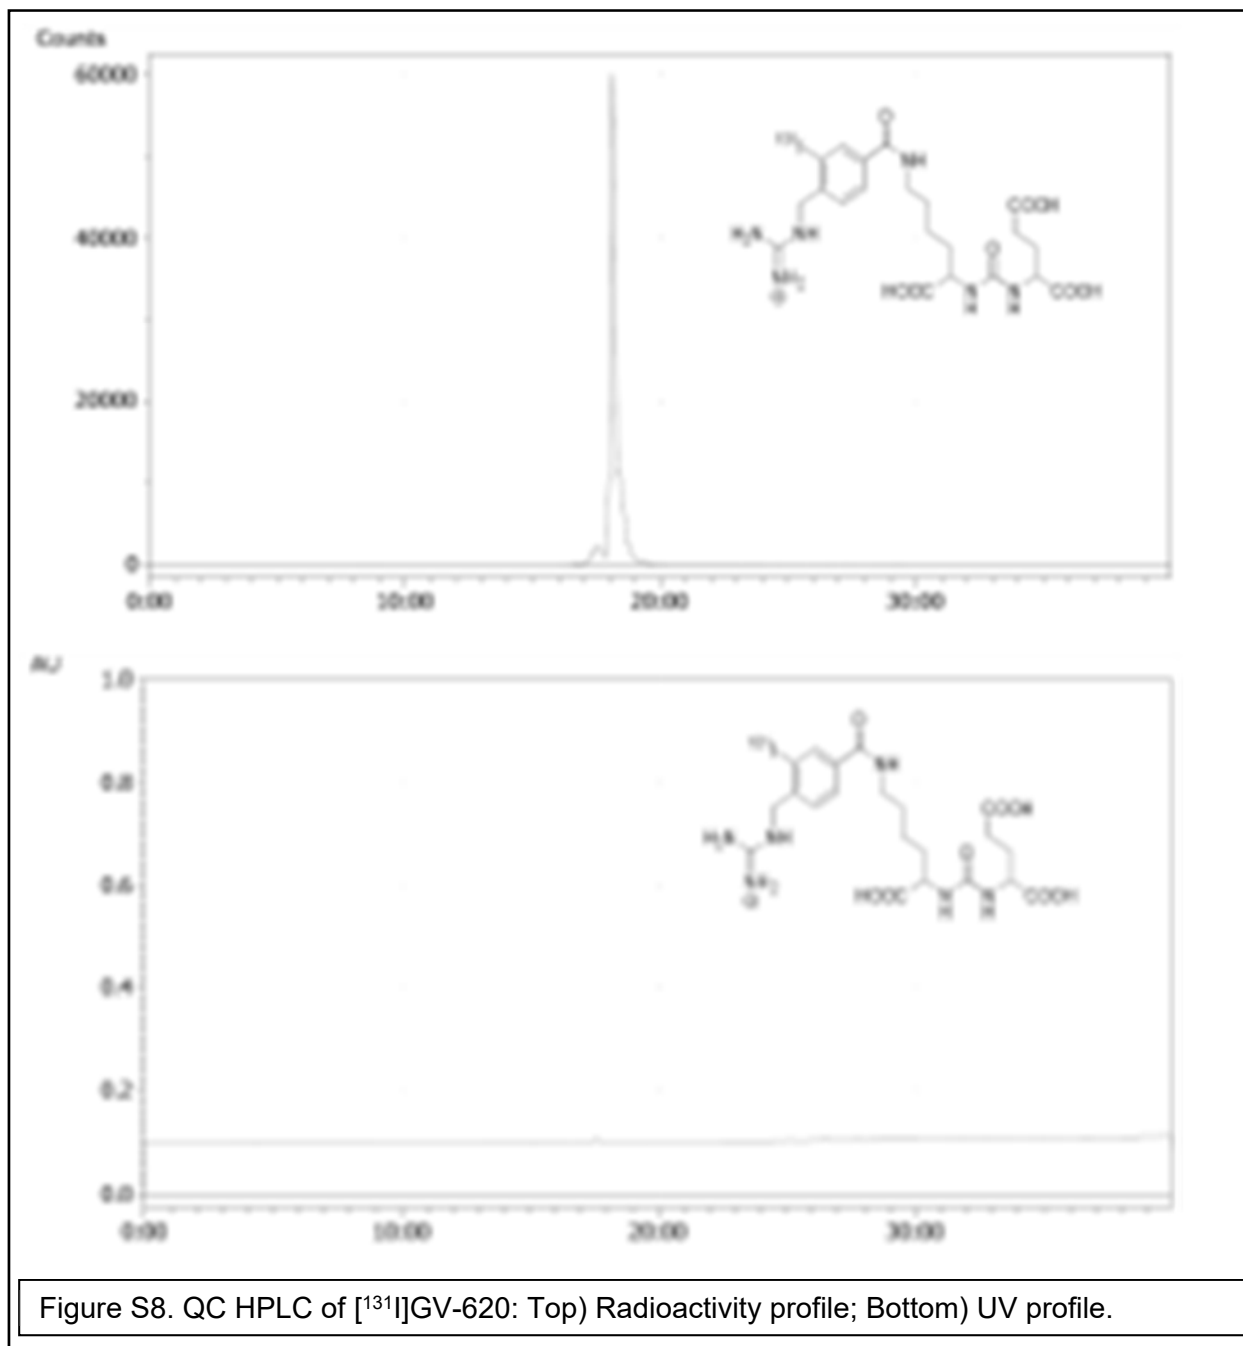



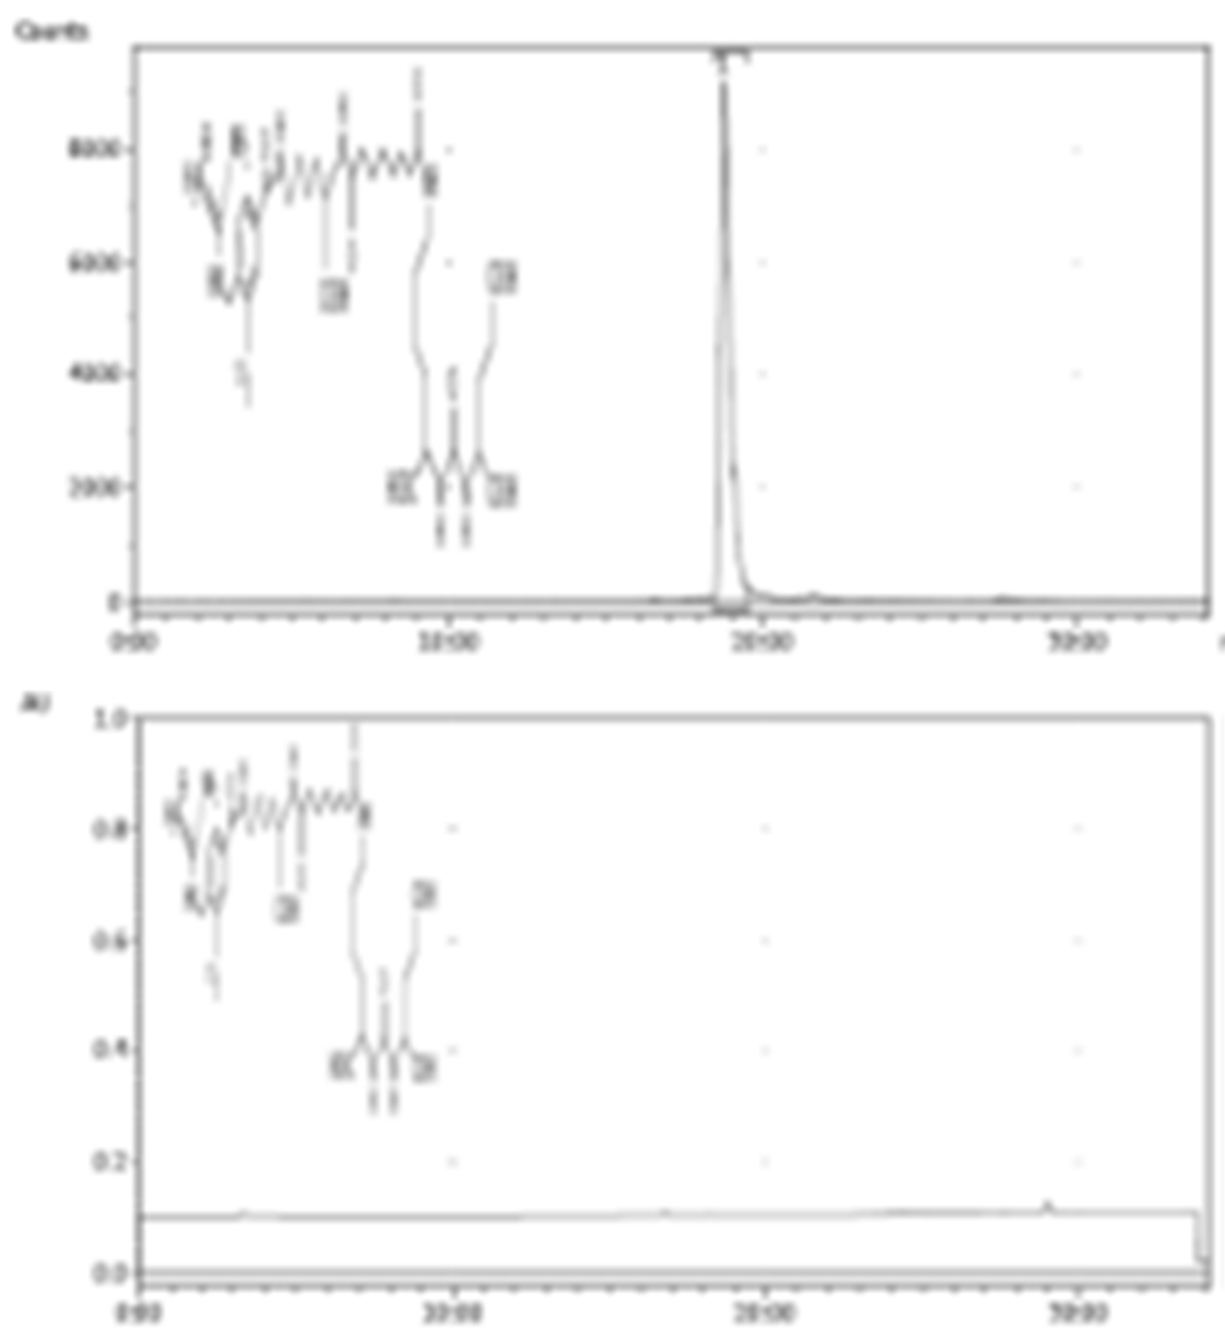

Figure S9. QC HPLC of [<sup>131</sup>I]GV-904: Top) Radioactivity profile; Bottom) UV profile.

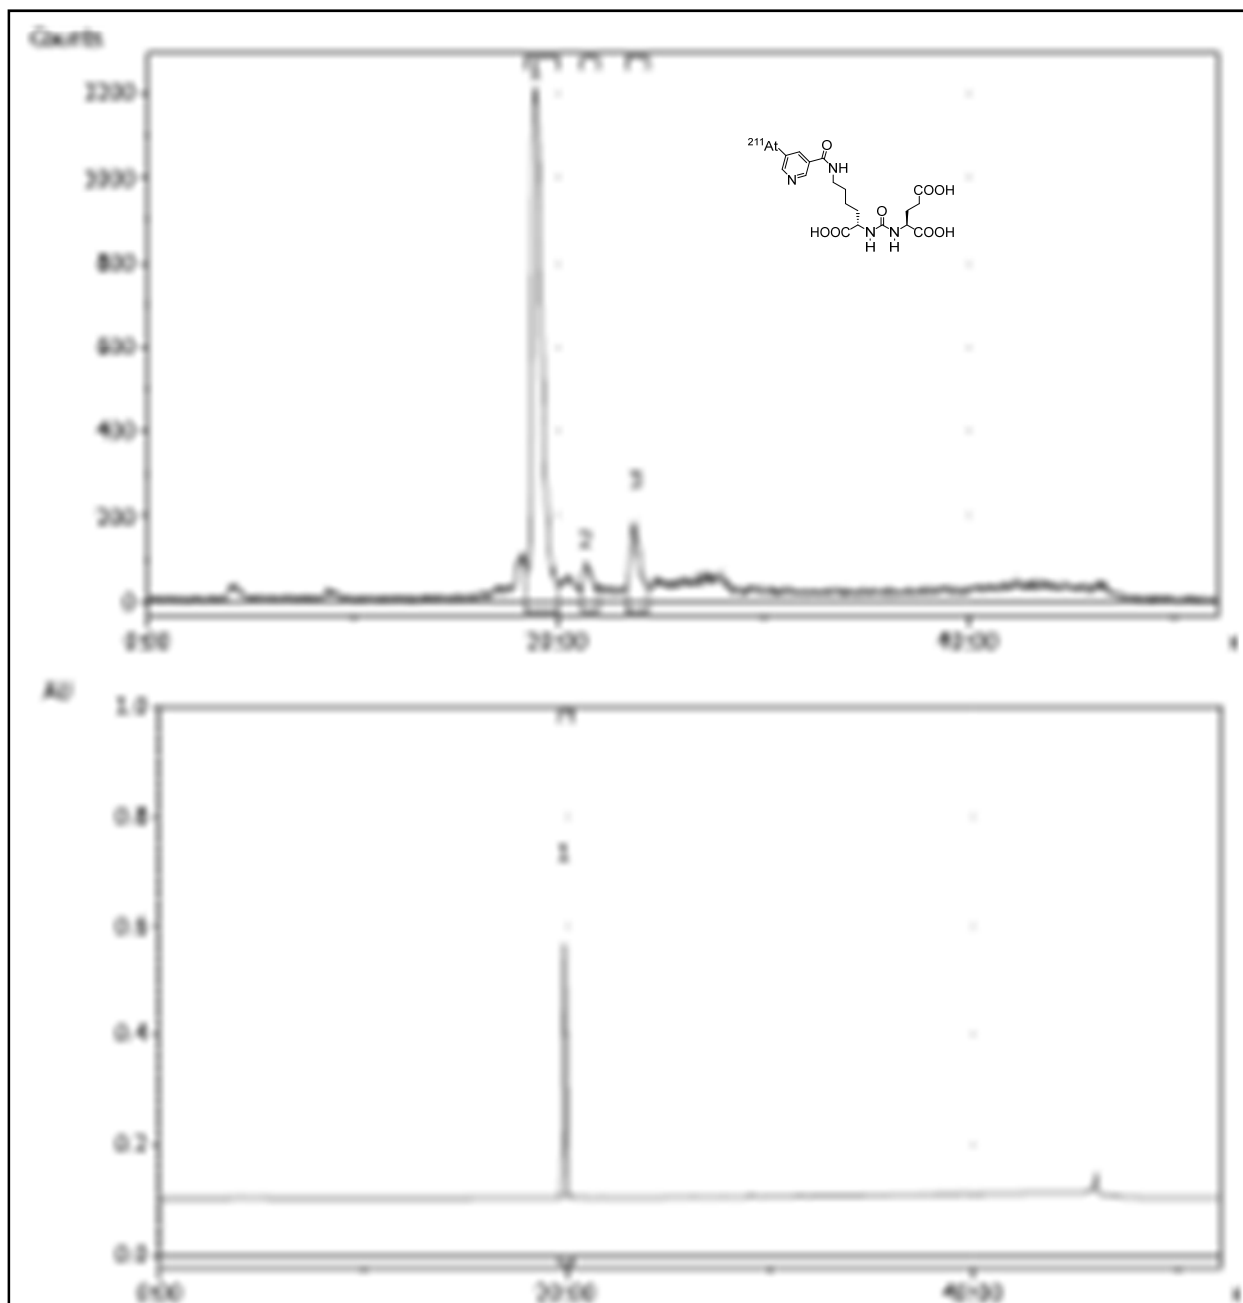

Figure S10. HPLC of  $[^{211}\text{At}]\text{YC-550}$  co-injected with YC-IV-550 standard: Top) Radioactivity profile and Bottom) UV profile.

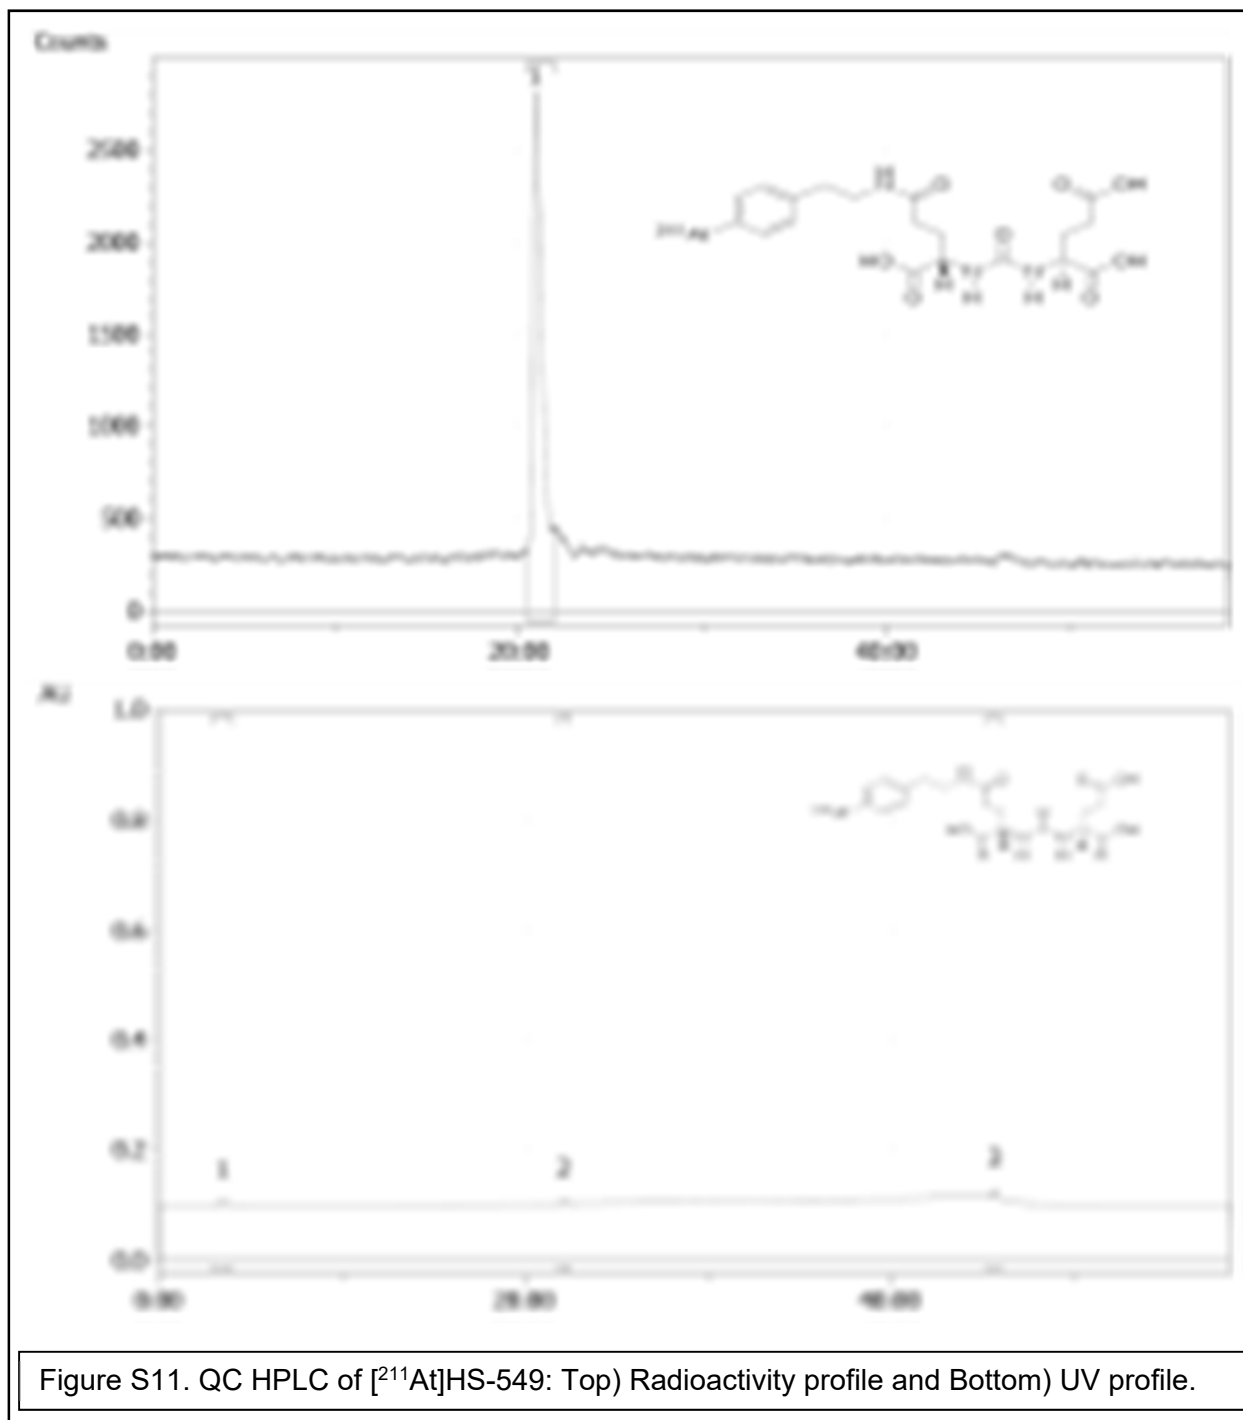

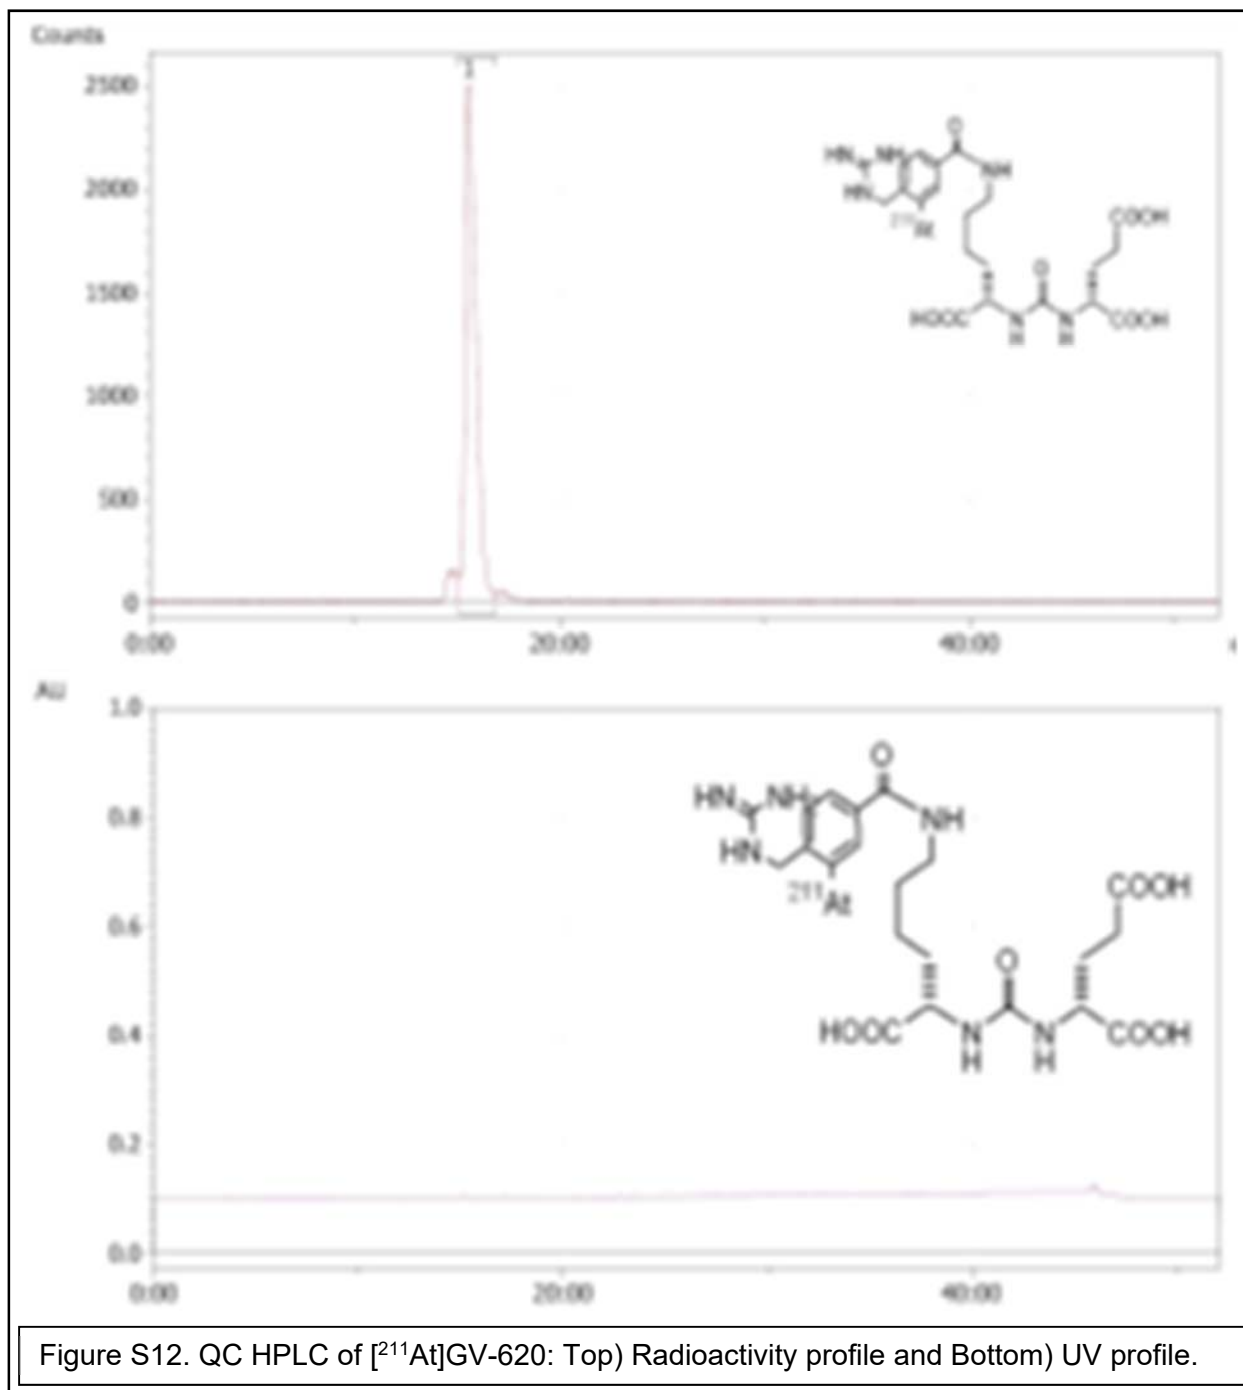

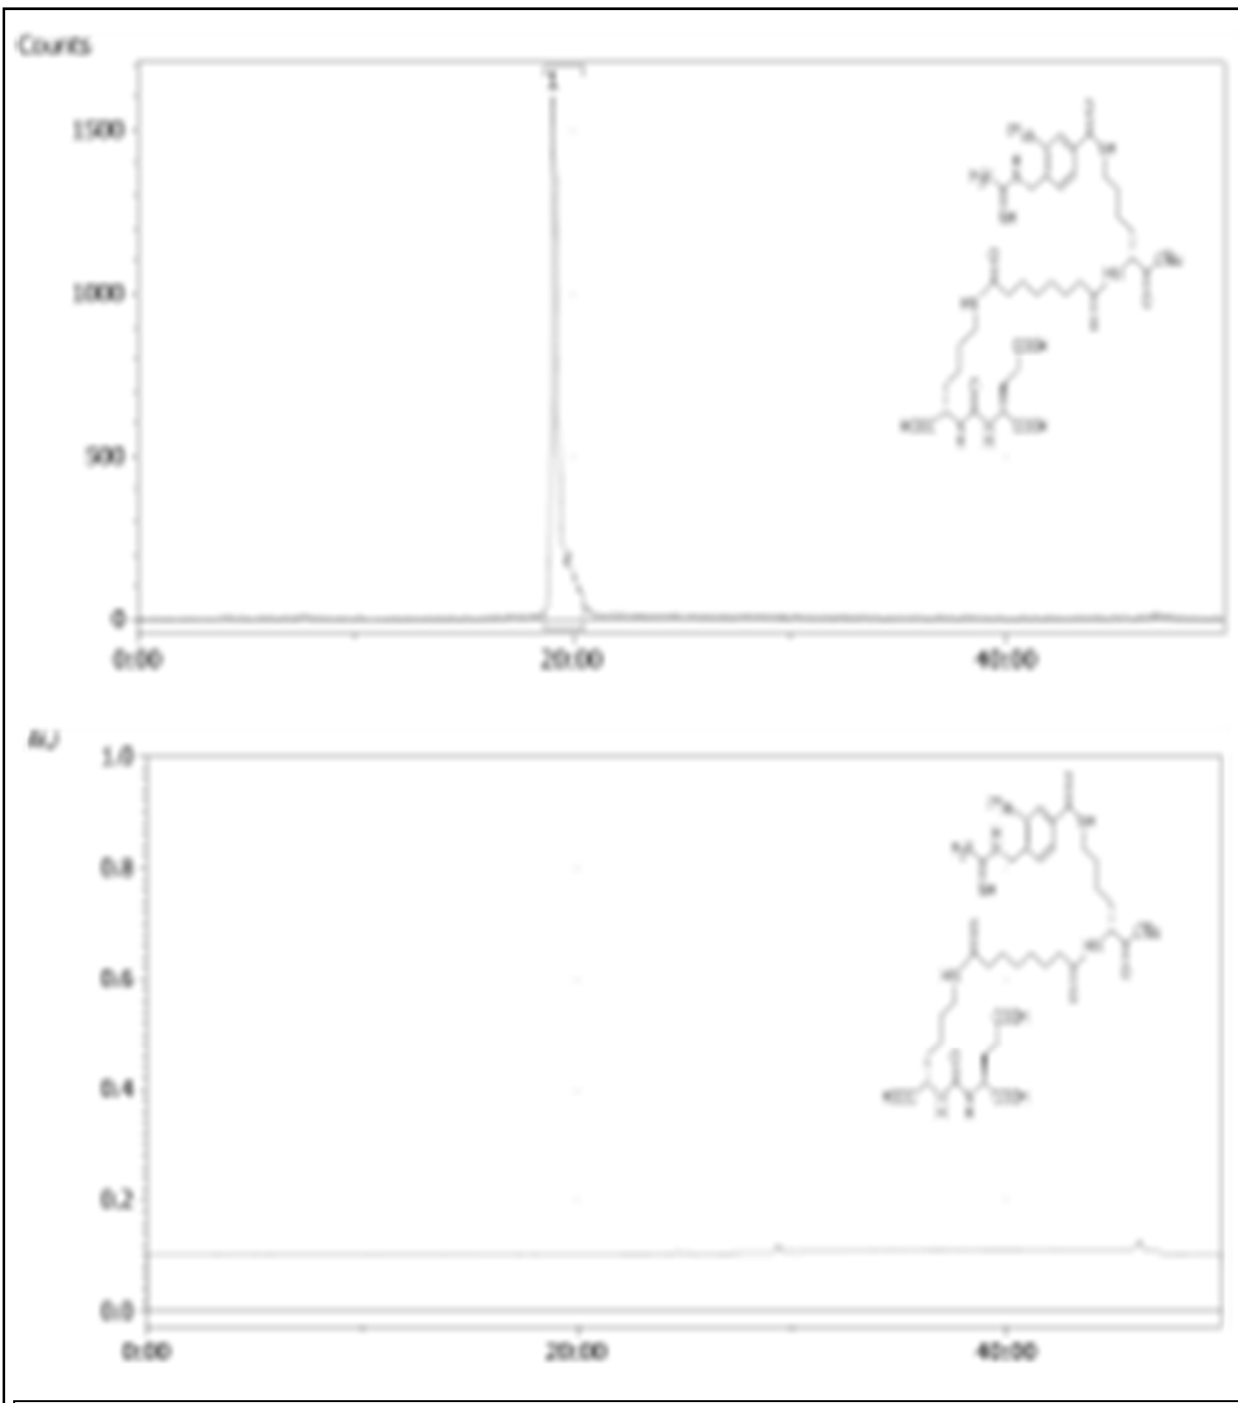

Figure S13. QC HPLC of  $[^{211}\text{At}]\text{GV-904}$ : Top) Radioactivity profile and Bottom) UV profile.
